# Supplementary material for: A Conceptual Framework for Sustainable Development of Ecosystem Services in Rice-Fish-Duck Forests: Systematic Literature Review
Source: Preprints.org preprint supplement (doi:10.20944/preprints202307.2070.v1), 2023-07-31
Supplement: Supplementary file 1 [file supplementary]

## Sheet: Sheet1
RFDFES Sustainable Development Framework			Sustainable Development Goals (SDGs)
Themes	Sub-Themes	Indicators	SDG 1	SDG 2	SDG 3	SDG 4	SDG 5	SDG 6	SDG 7	SDG 8	SDG 9	SDG 10	SDG 11	SDG 12	SDG 13	SDG 14	SDG 15	SDG 16	SDG 17	Count
Regulational	1.1Rule of Law：Governments and Locals	1.1.1policies、laws、regulations											×	×			×		×	4
		1.1.2Decentralisation management						×					×				×			1
	1.2Recommendations：NGOs and e×perts	1.2.1Applying modern knowledge and skills		×		×				×										3
		1.2.2Assisting governments and communities																	×	1
	1.3Communities and Indigenous	1.3.1Village Rules															×			1
		1.3.2Indigenous Knowledge Management						×					×							0
Ecological	2.1Ecological environment	2.1.1Different land uses															×			1
		2.1.2Soil use and protection		×					×					×			×			3
		2.1.3Water use and protection						×						×			×			3
		2.1.4Forests use and conservation													×		×			2
		2.1.5Climate regulation																		0
	2.2 Biodiversity	2.2.1Landscape/habitat conservation plans															×			1
		2.2.2Species diversity（Rice varieties, fish varieties, plant diversity）		×																1
Economic	3.1Economic investments	3.1.1Material investments（Money, equipment farming tools, buildings, production materials, water and energy）																		0
		3.1.2Non-material investments（manpower, time, and,Operation & Management）																		0
	3.2Economic benefits	3.2.1Crop yield and production		×					×											2
		3.2.2Production subsidies																		0
		3.2.3Participant's investment（Suppliers）																		0
		3.2.4Production added value（Tourism, education, cultural activities）							×					×						2
Socio-Cultural	4.1Quality of life	4.1.1Working conditions（Environment, farm equipment, time）			×					×										2
		4.1.2Public Health and Health Safety			×			×												2
		4.1.3Provide employment		×										×						2
		4.1.4Food Security and Livelihood Protection							×					×						2
	4.2Cultural diversities	4.2.1Indigenous knowledge		×		×														2
		4.2.2History and Culture				×					×		×	×						4
		4.2.3Religious beliefs								×										1
		4.2.4Cultural activities				×							×	×						3
	4.3Conflict resolution among stakeholders	4.3.1Resource management rights	×	×						×										3
		4.3.2Recognition of indigenous knowledge and skills		×		×				×										3
		Count	1	8	2	5	0	4	3	5	1	0	5	7	1	0	8	0	2
