# Supplementary material for: A Conceptual Framework for Sustainable Development of Ecosystem Services in Rice-Fish-Duck Forests: Systematic Literature Review
Source: Preprints.org preprint supplement (doi:10.20944/preprints202307.2070.v1), 2023-07-31
Supplement: Supplementary file 3 [file Appendix A.xlsx]

## Sheet: Sheet1
RFDFES Sustainable Development Framework			Sources					Problems
Themes	Sub-Themes	Indicators	ITTO(2016)	SAFA(2013)	MPCI(2015)	IDEA(2008)	Publications	Deforestation	Marginalised socio-cultural	Low-Participation Communities and Indigenous
Regulational	1.1Rule of Law：Governments and Locals	1.1.1policies、laws、regulations	X	X			X	X
		1.1.2Decentralisation management					X		X	X
	1.2Recommendations：NGOs and experts	1.2.1Applying modern knowledge and skills	X				X
		1.2.2Assisting governments and communities	X	X	X		X
	1.3Communities and Indigenous	1.3.1Village Rules					X	X	X	X
		1.3.2Indigenous Knowledge Management	X	X			X	X	X	X
Ecological	2.1Ecological environment	2.1.1Different land uses	X			X	X	X	X	X
		2.1.2Soil use and protection	X	X	X		X		X	X
		2.1.3Water use and protection	X	X	X	X	X		X	X
		2.1.4Forests use and conservation	X		X		X	X	X	X
		2.1.5Climate regulation		X	X		X	X
	2.2 Biodiversity	2.2.1Landscape/habitat conservation plans		X			X	X		X
		2.2.2Species diversity（Rice varieties, fish varieties, plant diversity）	X	X	X	X	X	X		X
Economic	3.1Economic investments	3.1.1Material investments（Money, equipment farming tools, buildings, production materials, water and energy）		X	X		X
		3.1.2Non-material investments（manpower, time, and,Operation & Management）		X			X
	3.2Economic benefits	3.2.1Crop yield and production	X	X	X	X	X
		3.2.2Production subsidies					X
		3.2.3Participant's investment（Suppliers）					X
		3.2.4Production added value（Tourism, education, cultural activities）	X	X	X		X			X
Socio-Cultural	4.1Quality of life	4.1.1Working conditions（Environment, farm equipment, time）		X			X
		4.1.2Public Health and Health Safety		X			X	X	X	X
		4.1.3Provide employment		X		X	X		X	X
		4.1.4Food Security and Livelihood Protection			X	X	X	X	X	X
	4.2Cultural diversities	4.2.1Indigenous knowledge	X	X			X	X	X	X
		4.2.2History and Culture	X				X	X	X	X
		4.2.3Religious beliefs	X				X	X	X	X
		4.2.4Cultural activities					X	X	X	X
	4.3Conflict resolution among stakeholders	4.3.1Resource management rights	X		X		X			X
		4.3.2Recognition of indigenous knowledge and skills	X				X			X
